# Supplementary material
Source: PubMed Central journal article supplement (PMC3924549)
Supplement: neo1601_0073SD1.pdf [file neo1601_0073SD1.pdf]

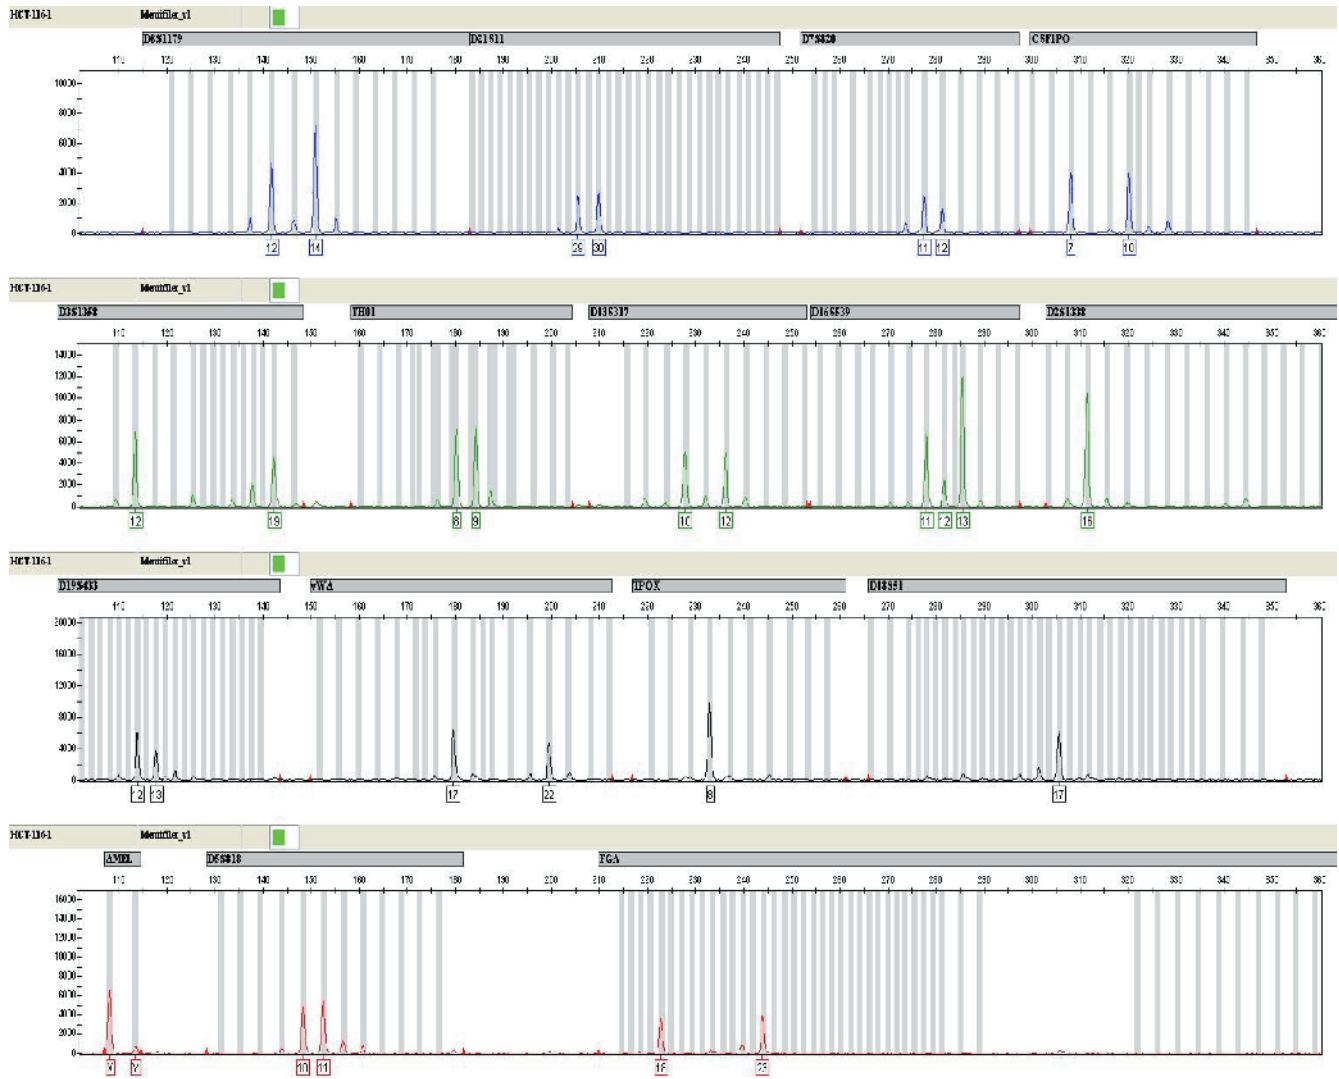

Figure W1. The short tandem repeat profiling results for the HCT116 cell line.

## STR Profile Results

| Sample           | D8S1179 | D21S11 | D7S820 | CSF1PO | D3S1358 | TH01 | D13S317 | D16S539  |
|------------------|---------|--------|--------|--------|---------|------|---------|----------|
| HCT-116(control) | 12,14   | 29,30  | 11,12  | 7,10   | 12,19   | 8,9  | 10,12   | 11,13    |
| HCT-116          | 12,14   | 29,30  | 11,12  | 7,10   | 12,19   | 8,9  | 10,12   | 11,12,13 |

| Sample           | D2S1338 | D19S433 | Vwa   | TPOX | D18S51 | Amelogenin | D5S818 | FGA   |
|------------------|---------|---------|-------|------|--------|------------|--------|-------|
| HCT-116(control) | 16      | 12,13   | 17,22 | 8    | 17     | X,Y        | 10,11  | 18,23 |
| HCT-116          | 16      | 12,13   | 17,22 | 8    | 17     | X,Y        | 10,11  | 18,23 |

**STR Kit** : AmpliFLSTR identifier PCR Amplification kit (Applied Biosystems, Foster, CA, cat.4322288)

**Analysis Methods** : 3730 DNA Analyzer (Applied Biosystems, Foster, CA)

: GeneMapper ID v3.2 (Applied Biosystems, Foster, CA)

The Fingerprinting of cell lines by 'AmpliFLSTR identifier PCR Amplification kit' was tested on January 21, 2013.

The Korean cell line bank guaranteed the authenticity of cell lines.

Korean Cell Line Bank  
Cancer Research Institute  
Seoul National University College of Medicine  
Seoul, Korea  
<http://cellbank.snu.ac.kr>  
Tel : 82-2-3668-7915, Fax : 82-2-742-0021



Ja-Lok Ku, D.V.M, Ph.D.  
Curator  
Korean Cell Line Bank  
E-mail : kujalok@snu.ac.kr

**Figure W2.** The short tandem repeat profiling results for the HCT116 cell line.
